# Supplementary material for: A novel model of nephrotic syndrome results from a point mutation in Lama5 and is modified by genetic background
Source: PubMed Central journal article supplement (PMC8883398; doi:10.1016/j.kint.2021.10.031), 2022-03
Supplement: mmc1.pdf [file mmc1.pdf]

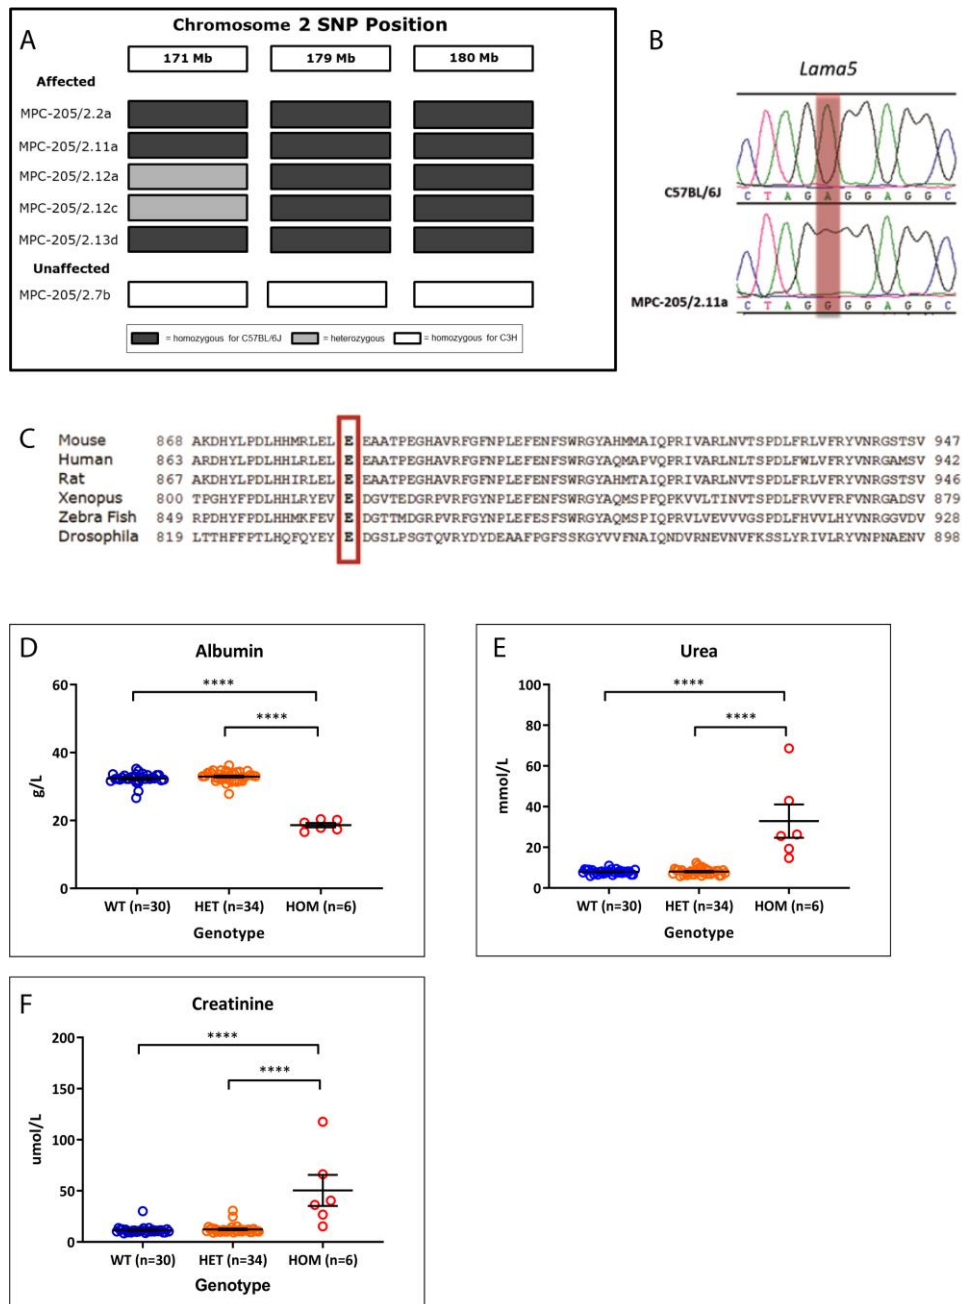

**Supplementary Figure 1. A:** Graphical representation of the candidate region on chromosome 2. **B:** Result of the Sanger sequencing of C57BL/6J control and an affected mouse from the MPC-205 line used to validate the mutation in *Lama5*. **C:** Comparison between the amino acid sequences of different species shows how the E884 residue is conserved down to Drosophila. **D-F:** Results of the clinical chemistry analysis of the pedigree MPC-205 at 6 months of age, with the animals grouped according to their genotype. The homozygous mice are the only ones showing alteration in the concentration of kidney markers (Albumin-D, Urea-E and Creatinine-F). The values shown are means  $\pm$  SEM. One-way ANOVA \*\*\*\*  $p < 0.0001$ .

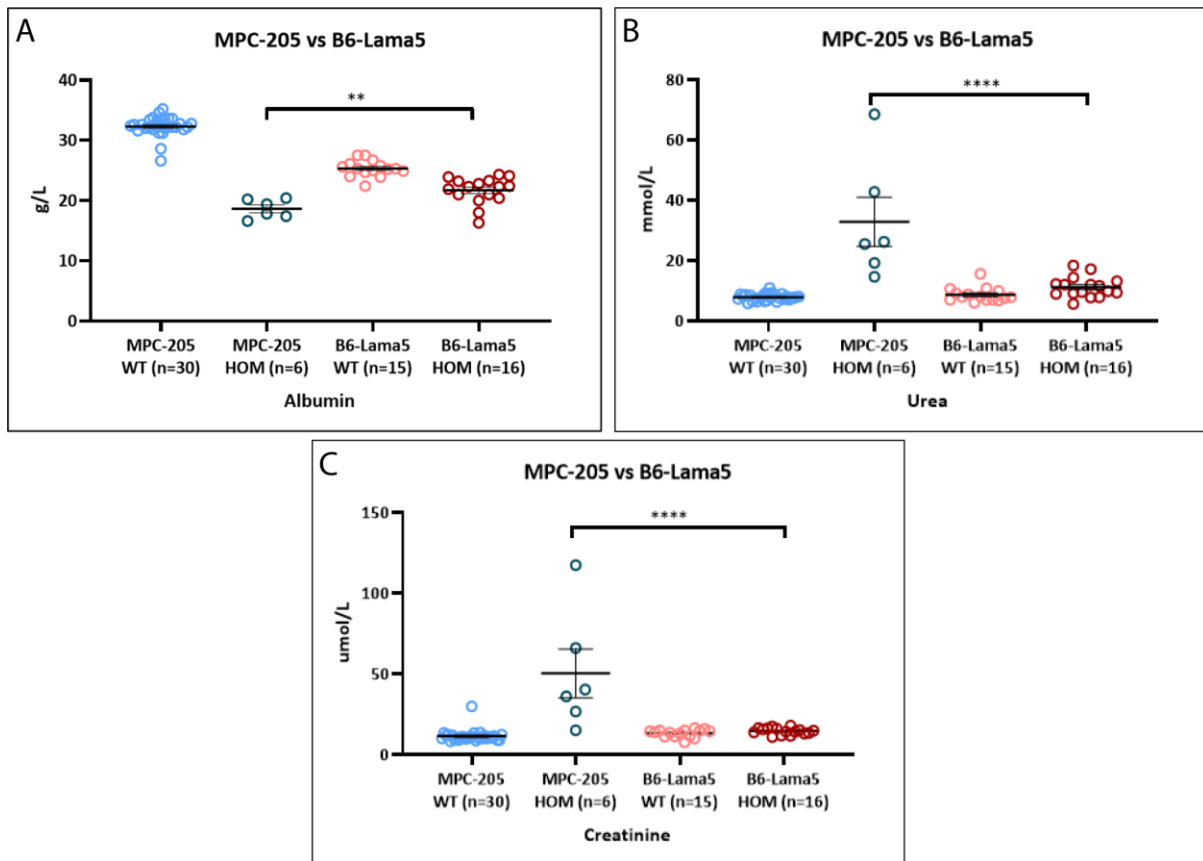

**Supplementary Figure 2.** Comparison of plasmatic albumin (A), urea (B) and creatinine (C) between the homozygous mice from the original pedigree and B6-*Lama5*<sup>E884G/E884G</sup> of the same age with respective wild type littermate controls. C57BL/6J congenic homozygous mice showed better kidney function when compared with 6 months old aged matched mixed background homozygotes (62.5% C57Bl/6J and 37.5% C3H.pde6).

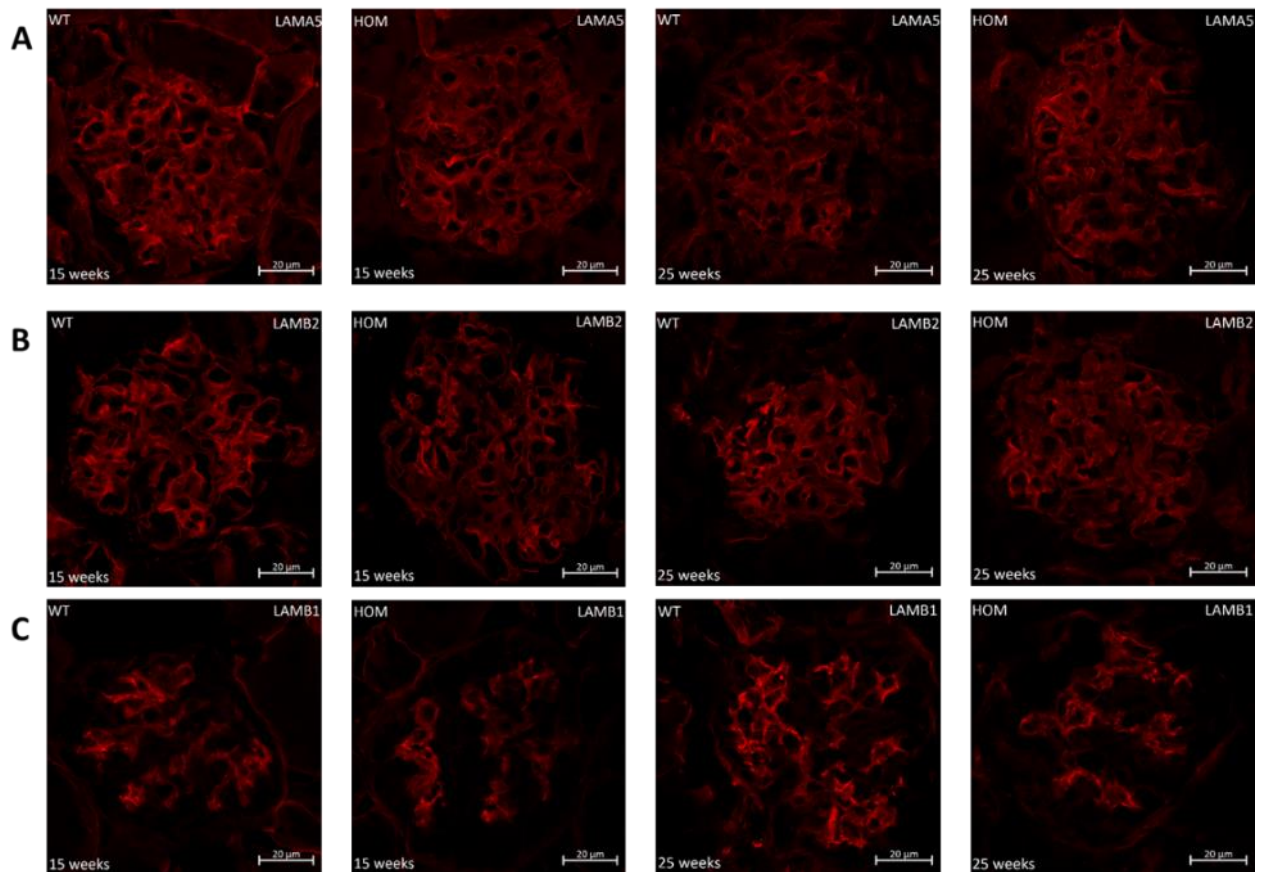

**Supplementary figure 3.** Representative immunofluorescence images of wild-type and homozygous mice, at 15 and 25 weeks, stained with anti-LAMA5 (**A**), anti-LAMB2 (**B**) and anti-LAMB1 (**C**). The mutant LAMA5 protein and its trimer partner LAMB2 are normally distributed in the homozygous sample suggesting a normal secretion and incorporation into the GBM. LAMB1 is expressed solely in the mesangium, demonstrating the absence of aberrant localization.

| Chromosome | Position  | Reference | Alteration | Functional Class      | Gene Description                                     | Gene Name |
|------------|-----------|-----------|------------|-----------------------|------------------------------------------------------|-----------|
| chr2       | 174640611 | A         | G          | upstream_gene_variant | zinc finger protein 831                              | Zfp831    |
| chr2       | 180630538 | T         | C          | intron_variant        | transcription factor-like 5 (basic helix-loop-helix) | Tcf15     |
| chr2       | 178110353 | C         | T          | intergenic_variant    | .                                                    | .         |
| chr2       | 180827429 | C         | T          | upstream_gene_variant | predicted gene 14340                                 | .         |
| chr2       | 178110363 | T         | C          | intergenic_variant    | .                                                    | .         |
| chr2       | 179906554 | T         | A          | intergenic_variant    | .                                                    | .         |
| chr2       | 181242002 | T         | C          | 5_prime_UTR_variant   | cDNA sequence BC006779                               | BC006779  |
| chr2       | 179379742 | T         | A          | intergenic_variant    | .                                                    | .         |
| chr2       | 173488306 | T         | C          | intergenic_variant    | .                                                    | .         |
| chr2       | 179187050 | A         | G          | intergenic_variant    | .                                                    | .         |
| chr2       | 174153756 | T         | A          | intron_variant        | predicted gene 10714                                 | .         |
| chr2       | 178641261 | T         | C          | intergenic_variant    | .                                                    | .         |
| chr2       | 180023388 | T         | C          | upstream_gene_variant | LSM14 homolog B (SCD6, <i>S. cerevisiae</i> )        | Lsm14b    |
| chr2       | 173944795 | C         | T          | intergenic_variant    | .                                                    | .         |
| chr2       | 179906558 | T         | A          | intergenic_variant    | .                                                    | .         |
| chr2       | 181246554 | C         | T          | upstream_gene_variant | cDNA sequence BC006779                               | BC006779  |
| chr2       | 173944800 | C         | T          | intergenic_variant    | .                                                    | .         |
| chr2       | 179252099 | T         | C          | intergenic_variant    | .                                                    | .         |
| chr2       | 179381932 | T         | A          | intergenic_variant    | .                                                    | .         |
| chr2       | 178818573 | T         | A          | intergenic_variant    | .                                                    | .         |
| chr2       | 180196271 | A         | G          | missense_variant      | laminin, alpha 5                                     | Lama5     |
| chr2       | 174505629 | T         | C          | intergenic_variant    | .                                                    | .         |
| chr2       | 178797493 | G         | T          | intergenic_variant    | .                                                    | .         |

**Supplementary Table 1.** List of the mutations included in the candidate region on chromosome 2. In light grey are shown the mutations with a low confidence score, in dark grey the mutations with a medium confidence score, in yellow the mutation with a high confidence score. *Lama5*<sup>E884G</sup> missense variant is the only coding high confidence mutation resulting from the WGS analysis.

| Variant      | PROVEAN                       | SIFT                        | SNAP                        | Meta-SNP                    | PhD-SNP                     |
|--------------|-------------------------------|-----------------------------|-----------------------------|-----------------------------|-----------------------------|
|              | -6.613                        | 0.000                       | 0.725                       | 0.691                       | 0.587                       |
| <b>E884G</b> | Deleterious<br>cutoff= < -2.5 | Deleterious<br>cutoff= <0.5 | Deleterious<br>cutoff= >0.5 | Deleterious<br>cutoff= >0.5 | Deleterious<br>cutoff= >0.5 |

**Supplementary Table 2.** Protein prediction software PROVEAN, SIFT, SNAP, Meta-SNP and PhD-SNP described the *Lama5*E884G mutation as deleterious.

|                     |                | Protein:Creatinine Ration<br>mg/mg creatinine | Urea (plasma)<br>mmol/L | Creatinine (plasma)<br>umol/L | Albumin (plasma)<br>g/L | Tot Cholesterol<br>(plasma)<br>mmol/L | HDL (plasma)<br>mmol/L | LDL (plasma)<br>mmol/L |
|---------------------|----------------|-----------------------------------------------|-------------------------|-------------------------------|-------------------------|---------------------------------------|------------------------|------------------------|
| C3pde- <i>Lama5</i> | WT - 15 weeks  | 0.79 (0.10)                                   | 6.78 (0.55)             | 11.22 (0.73)                  | 26.52 (0.46)            | 3.52 (0.17)                           | 2.44 (0.11)            | 0.69 (0.07)            |
|                     | HOM - 15 weeks | 15.06 (2.53)                                  | 17.86 (2.96)            | 21.86 (4.02)                  | 19.76 (0.67)            | 7.55 (0.36)                           | 4.74 (0.32)            | 2.06 (0.15)            |
| B6- <i>Lama5</i>    | WT - 15 weeks  | 1.85 (0.13)                                   | 9.32 (0.59)             | 11.89 (0.46)                  | 25.96 (0.43)            | 1.98 (0.12)                           | 1.34 (0.10)            | 0.42 (0.02)            |
|                     | HOM - 15 weeks | 2.99 (0.48)                                   | 10.15 (0.75)            | 11.91 (0.64)                  | 24.23 (0.38)            | 2.08 (0.14)                           | 1.38 (0.10)            | 0.45 (0.03)            |
|                     | WT - 25 weeks  | 2.08 (0.13)                                   | 8.75 (0.62)             | 13.33 (0.61)                  | 25.33 (0.35)            | 2.08 (0.11)                           | 1.42 (0.08)            | 0.52 (0.05)            |
|                     | HOM - 25 weeks | 26.41 (3.99)                                  | 11.24 (0.85)            | 14.68 (0.52)                  | 21.70 (0.55)            | 3.02 (0.26)                           | 2.01 (0.16)            | 0.75 (0.09)            |

**Supplementary Table 3.** Summary of urinary protein:creatinine ratio and clinical chemistry analysis on plasma of congenic 15 weeks old C3pde-*Lama5*, congenic 15 weeks old B6-*Lama5* and congenic 25 weeks old B6-*Lama5*. Values displayed represent average and SEM in brackets.
